# Supplementary material
Source: PubMed Central journal article supplement (PMC2631056)
Supplement: pbio.1000008.sg002.pdf [file pbio.1000008.sg002.pdf]

|        |      |   |      |   |      |   |   |    |    |    |    |   |    |    |    |   |   |   |   |   |    |    |   |   |   |    |    |    |   |   |    |    |    |    |    |    |    |    |   |   |   |   |   |   |   |    |    |    |    |    |   |   |   |   |   |   |   |    |    |   |   |   |   |   |   |    |    |   |   |   |   |   |   |   |   |   |   |   |   |   |   |   |   |    |    |   |   |   |   |   |
|--------|------|---|------|---|------|---|---|----|----|----|----|---|----|----|----|---|---|---|---|---|----|----|---|---|---|----|----|----|---|---|----|----|----|----|----|----|----|----|---|---|---|---|---|---|---|----|----|----|----|----|---|---|---|---|---|---|---|----|----|---|---|---|---|---|---|----|----|---|---|---|---|---|---|---|---|---|---|---|---|---|---|---|---|----|----|---|---|---|---|---|
|        |      |   | D135 |   | E167 |   |   |    |    |    |    |   |    |    |    |   |   |   |   |   |    |    |   |   |   |    |    |    |   |   |    |    |    |    |    |    |    |    |   |   |   |   |   |   |   |    |    |    |    |    |   |   |   |   |   |   |   |    |    |   |   |   |   |   |   |    |    |   |   |   |   |   |   |   |   |   |   |   |   |   |   |   |   |    |    |   |   |   |   |   |
|        |      |   | *    |   | *    |   |   |    |    |    |    |   |    |    |    |   |   |   |   |   |    |    |   |   |   |    |    |    |   |   |    |    |    |    |    |    |    |    |   |   |   |   |   |   |   |    |    |    |    |    |   |   |   |   |   |   |   |    |    |   |   |   |   |   |   |    |    |   |   |   |   |   |   |   |   |   |   |   |   |   |   |   |   |    |    |   |   |   |   |   |
| Swt1   | 131  | A | F    | V | V    | D | T | N  | F  | I  | S  | H | I  | N  | T  | L | E | K | I | R | S  | L  | S | S | T | -- | Y  | H  | H | L | I  | V  | P  | T  | V  | I  | O  | E  | L | D | G | L | K | K | S | P  | -- | D  | I  | A  | R | N | D | D | T | T | N | O  | E  | H | D | R | T | I | G | T  | L  | A | R | W | G | N | D | W | I | Y | K | N | L | A | N | L | D | S  | G  | I | G | O | K |   |
| SpSwt1 | 68   | L | F    | V | L    | D | T | N  | F  | L  | S  | H | I  | S  | L  | C | O | N | I | E | F  | L  | T | A | R | C  | P  | R  | L | V | V  | V  | L  | P  | W  | T  | V  | I  | O | E | L | D | G | L | K | -- | -- | S  | E  | S  | S | T | C | G | Y | L | A | R  | O  | A | H | N | F | L | L | O  | C  | F | R | S | N | V | S | L | R | G | O | K |   |   |   |   |   |    |    |   |   |   |   |   |
| DmSwt1 | 254  | Y | F    | V | L    | D | T | N  | V  | L  | H  | N | H  | K  | F  | V | E | R | L | T | D  | V  | V | L | P | G  | T  | V  | G | S | M  | L  | P  | Y  | I  | V  | I  | K  | E | L | D | R | L | K | S | -- | -- | K  | Y  | Q  | S | D | C | L | O | R | V | I  | A  | M | R | A | T | R | F | L  | N  | T | K | F | D | E | S | F | O | I | O | A | O | S | A |   |   |    |    |   |   |   |   |   |
| HsSwt1 | 389  | L | I    | V | I    | D | T | N  | I  | L  | M  | N | I  | K  | F  | V | R | I | L | K | T  | T  | E | V | P | G  | F  | D  | K | L | V  | L  | I  | P  | W  | V  | V  | M  | O | E | L | D | R | M | K | E  | -- | -- | G  | K  | L | K | R | A | Q | H | K | A  | I  | P | A | V | H | F | I | N  | D  | S | L | K | N | O | D | R | K | L | W | G | O | S |   |   |   |    |    |   |   |   |   |   |
| DmSmg6 | 773  | Y | L    | L | P    | D | T | N  | C  | F  | I  | D | C  | L  | E  | D | F | E | K | L | S  | T  | E | F | K | -- | -- | R  | Y | T | L  | I  | I  | P  | L  | V  | V  | K  | E | L | D | G | L | S | K | G  | V  | K  | L  | D  | S | Y | R | S | S | K | Q | T  | Q  | R | I | H | F | D | E | V  | S  | S | R | A | K | K | S | L | E | F | I | K | S | A | K | G | N | -- | -- | V | K | C | A | T |
| HsSmg6 | 1242 | F | L    | V | P    | D | T | N  | G  | F  | I  | D | E  | L  | A  | S | L | A | R | L | -- | -- | L | E | S | R  | -- | -- | K | Y | I  | L  | V  | V  | P  | L  | I  | V  | I | N | E | L | D | G | L | A  | K  | G  | O  | E  | T | D | H | R | A | G | G | -- | -- | Y | A | R | V | V | O | E  | K  | A | R | K | S | I | E | F | L | E | Q | R | F | E | S | R | D | S  | C  | I | R | A | L | T |
|        |      |   | D238 |   | D257 |   |   |    |    |    |    |   |    |    |    |   |   |   |   |   |    |    |   |   |   |    |    |    |   |   |    |    |    |    |    |    |    |    |   |   |   |   |   |   |   |    |    |    |    |    |   |   |   |   |   |   |   |    |    |   |   |   |   |   |   |    |    |   |   |   |   |   |   |   |   |   |   |   |   |   |   |   |   |    |    |   |   |   |   |   |
|        |      |   | *    |   | *    |   |   |    |    |    |    |   |    |    |    |   |   |   |   |   |    |    |   |   |   |    |    |    |   |   |    |    |    |    |    |    |    |    |   |   |   |   |   |   |   |    |    |    |    |    |   |   |   |   |   |   |   |    |    |   |   |   |   |   |   |    |    |   |   |   |   |   |   |   |   |   |   |   |   |   |   |   |   |    |    |   |   |   |   |   |
| Swt1   | 223  | L | K    | Q | S    | L | N | -- | -- | -- | -- | P | G  | S  | L  | K | D | D | S | I | L  | D  | C | C | I | Y  | F  | K  | E | I | L  | -- | -- | -- | -- | -- | -- | N  | C | F | V | I | L | L | S | N  | D  | K  | N  | L  | C | T | K | A | L | T | E | D  | L  | T | V | S | F | R | K | N  | M  | D | A | K | I | A |   |   |   |   |   |   |   |   |   |   |   |    |    |   |   |   |   |   |
| SpSwt1 | 148  | V | H    | E | H    | C | S | -- | -- | -- | -- | S | T  | E  | K  | G | D | D | A | I | L  | D  | C | C | I | Y  | Q  | E  | E | K | -- | -- | -- | -- | -- | -- | L  | I  | P | A | V | L | L | S | D | D  | K  | N  | L  | S  | I | K | A | A | V | H | H | T  | Q  | S | L | S | F | S | K | G  | L  | E | A | A | S | I | V |   |   |   |   |   |   |   |   |   |   |    |    |   |   |   |   |   |
| DmSwt1 | 336  | L | E    | E | A    | D | H | -- | -- | -- | -- | L | I  | K  | I  | D | C | P | D | D | S  | I  | L | N | C | C  | I  | Q  | L | O | A  | Q  | V  | P  | -- | -- | -- | -- | H | M | I | L | L | T | N | D  | A  | N  | L  | R  | L | K | A | N | A | S | N | I  | O  | V | S | C | R | S | D | L  | M  | S | T | Y | V | D |   |   |   |   |   |   |   |   |   |   |   |    |    |   |   |   |   |   |
| HsSwt1 | 470  | I | Q    | L | A    | S | Q | K  | H  | Y  | G  | L | -- | -- | -- | S | D | E | N | N | D  | R  | V | L | K | C  | C  | L  | O | H | Q  | E  | L  | F  | P  | -- | -- | -- | C | S | F | V | I | L | C | T  | D  | D  | R  | N  | L | R | N | K | G | I | S | G  | V  | K | S | L | S | K | E | -- | -- | S | A | E | L | H |   |   |   |   |   |   |   |   |   |   |   |    |    |   |   |   |   |   |
| DmSmg6 | 861  | T | K    | G | S    | F | V | N  | A  | S  | V  | F | A  | -- | -- | L | V | E | E | E | Y  | L  | S | N | D | D  | K  | I  | L | A | T  | A  | M  | A  | V  | S  | K  | T  | A | K | T | E | Q | C | T | D  | G  | K  | -- | -- | C | F | I | Q | T | E | L | V  | L  | I | T | D | R | N | L | R  | V  | K | A | L | S | R | N | L | A | V | S | A | L | D | E | F | L | O  | W  | A | K | D | C |   |
| HsSmg6 | 1326 | S | R    | G | N    | E | L | E  | S  | I  | A  | F | R  | S  | E  | D | I | T | G | Q | L  | G  | N | N | D | D  | L  | I  | L | S | C  | C  | L  | H  | Y  | C  | K  | D  | K | A | K | D | F | M | P | A  | S  | K  | E  | E  | P | I | R | L | L | R | E | V  | L  | L | T | D | D | R | N | L  | R  | V | K | A | L | T | R | N | V | P | V | R | D | I | P | A | F | L  | T  | W | A | O | V | G |
