# Supplementary material
Source: PubMed Central journal article supplement (PMC2631056)

synthetic lethality

synergistic enhancement

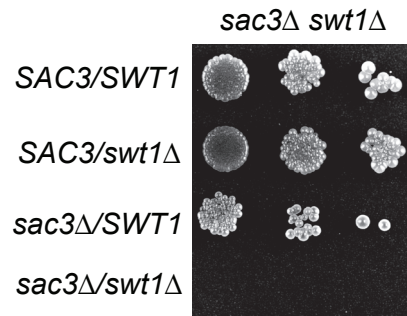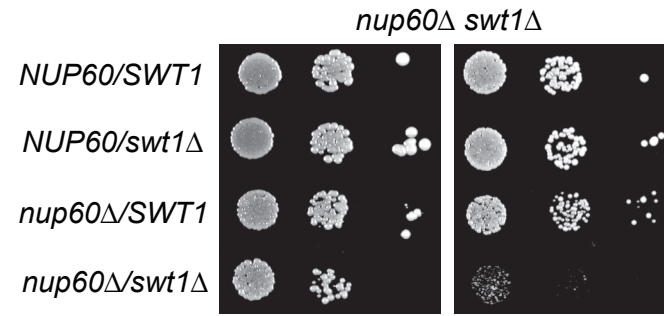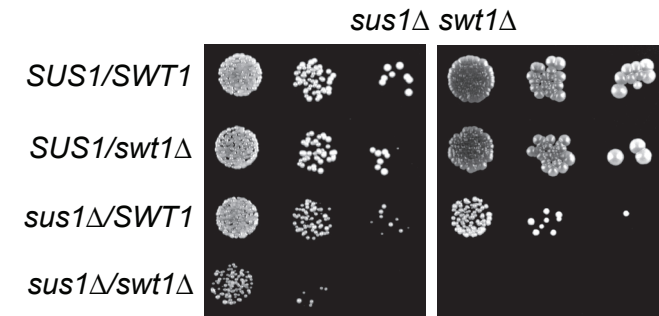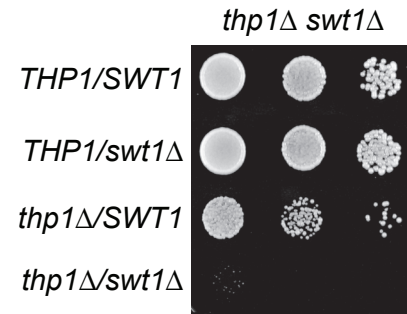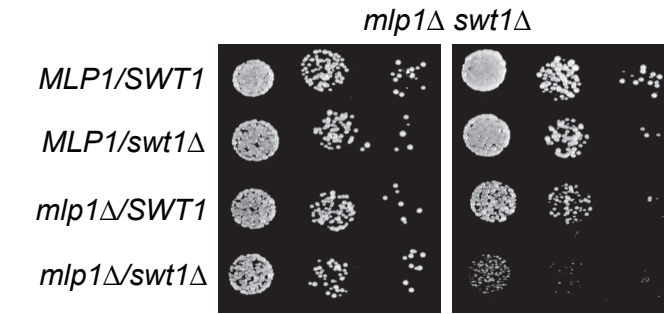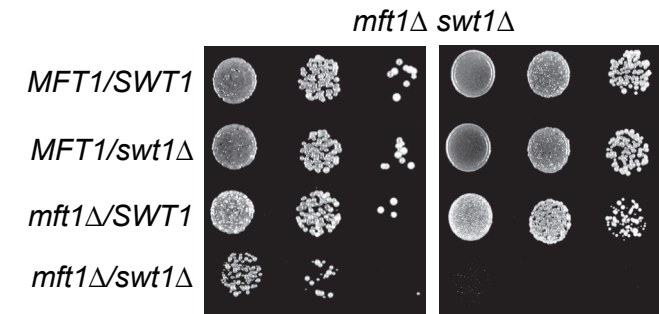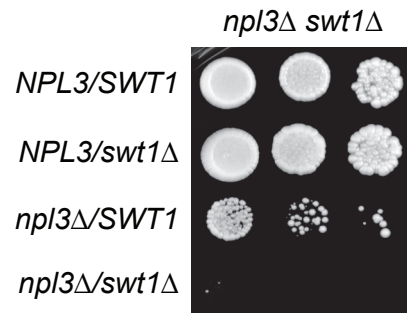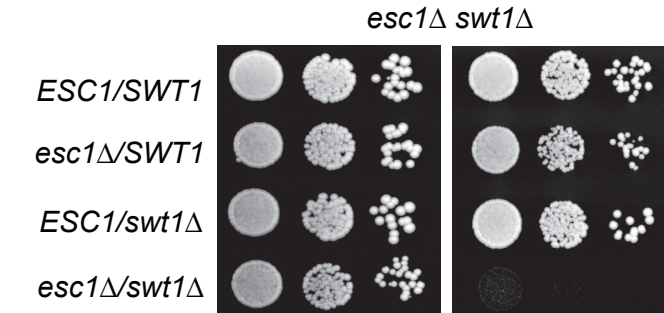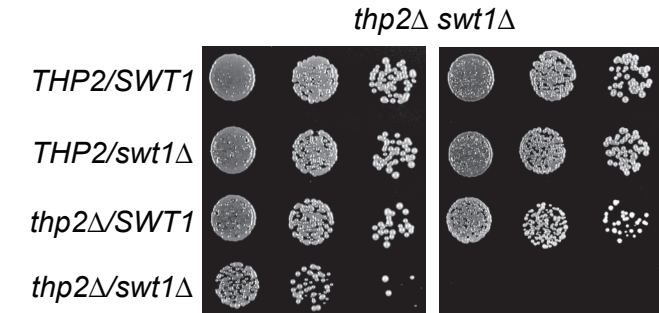

30°C

30°C

36°C

30°C

36°C

Supplement: pbio.1000008.sg001.pdf [file pbio.1000008.sg001.pdf]

**A**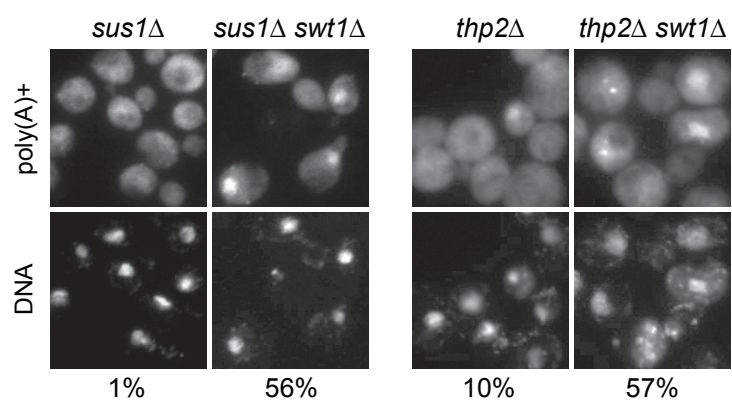**B**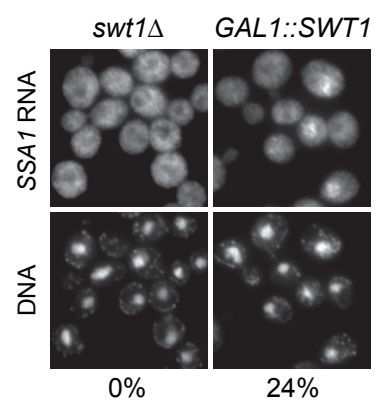**C**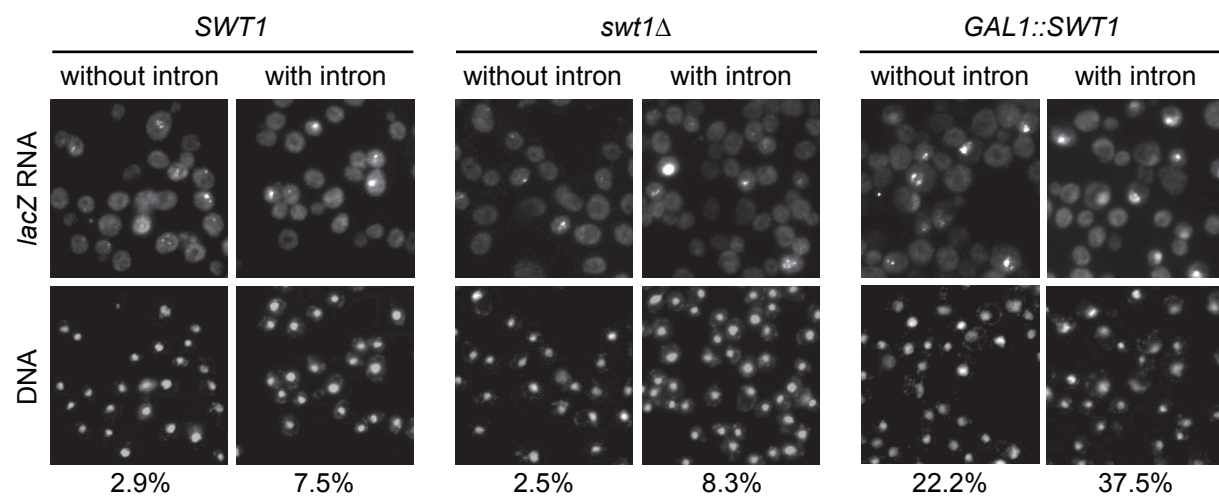**Figure S3 (Skruzny et al., 2008)**

Supplement: pbio.1000008.sg003.pdf [file pbio.1000008.sg003.pdf]

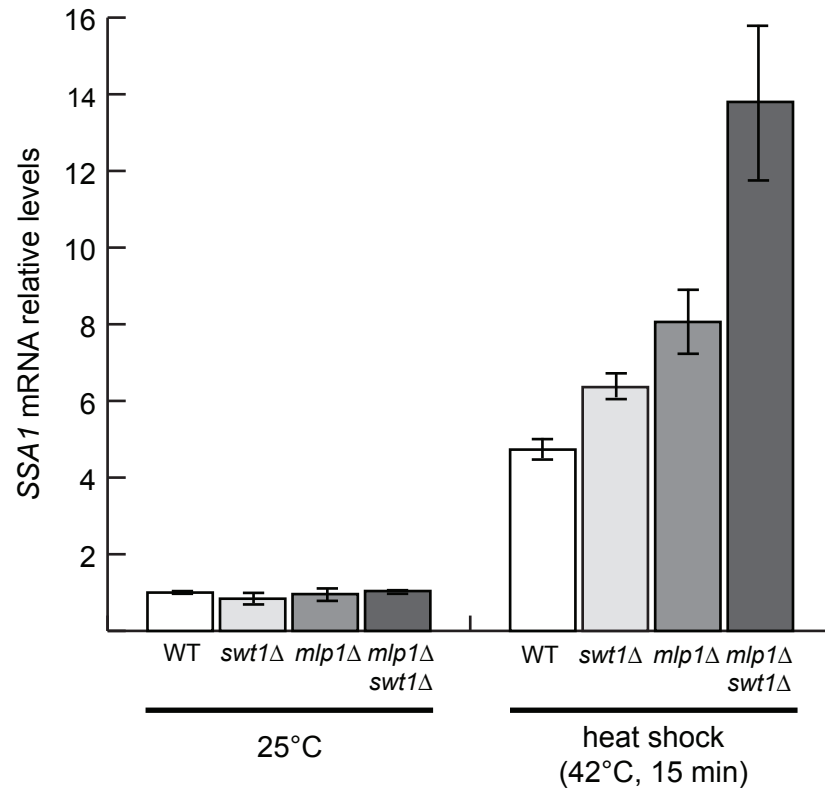

Supplement: pbio.1000008.sg004.pdf [file pbio.1000008.sg004.pdf]

**A**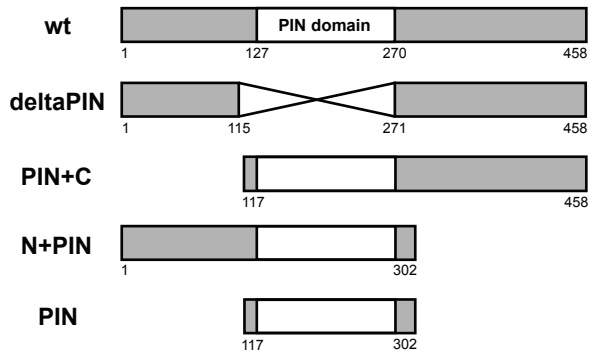**B**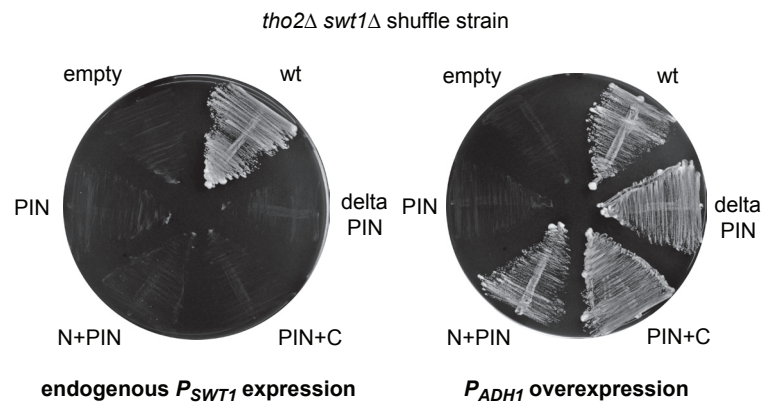

Supplement: pbio.1000008.sg005.pdf [file pbio.1000008.sg005.pdf]

**A**

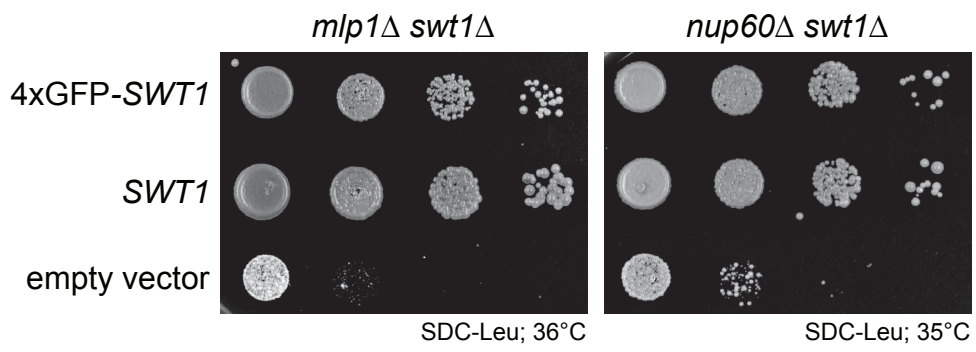

**B**

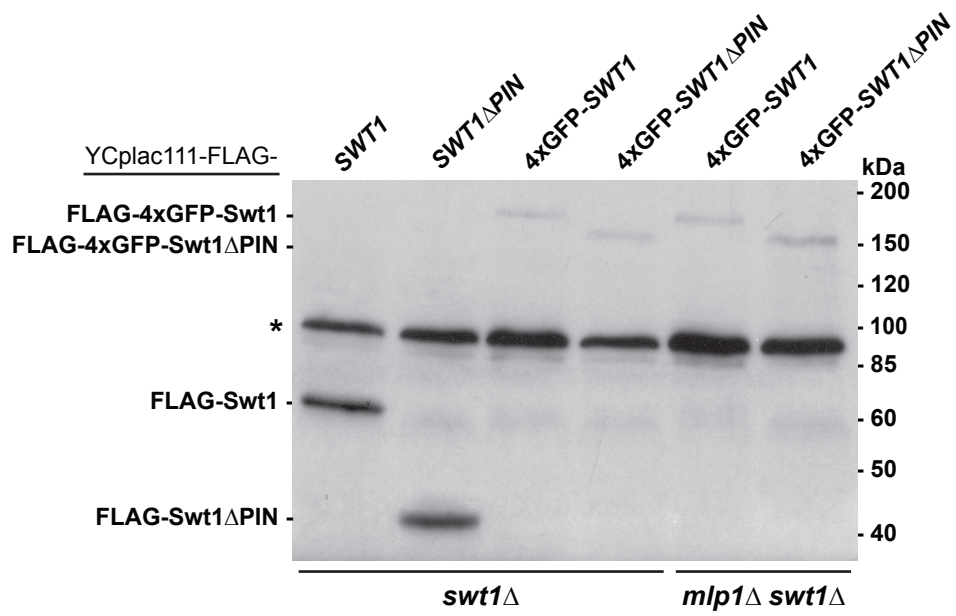

Supplement: pbio.1000008.sg006.pdf [file pbio.1000008.sg006.pdf]
